# Supplementary material for: N,N-Dimethylaminoethyl methacrylate-based core/shell microgels loaded with silver nanoparticles for catalysis
Source: Royal Society of Chemistry journal article supplement (doi:10.1039/d4ra06157h), 2024-01-01
Supplement: d4ra06157h1.pdf [file d4ra06157h1.pdf]

## *Supporting Information*

### ***N,N*-dimethylaminoethyl methacrylate based core shell microgels loaded with silver nanoparticles for catalysis**

Muhammad Khizar Hyat <sup>a</sup>, Prashun Ghosh Roy <sup>b</sup>, Muhammad Azam<sup>a</sup>, Shuiqin Zhou <sup>b</sup>, Ahmad Irfan <sup>c</sup>, Nayab Batool Rizvi<sup>a</sup>, Robina Begum <sup>a,\*</sup>, Zahoor H. Farooqi <sup>a\*</sup>

<sup>a</sup> *School of Chemistry, University of the Punjab, New Campus, Lahore 54590, Pakistan*

<sup>b</sup> *Department of Chemistry of College of Staten Island, The City University of New York, Staten Island, New York 10314, USA*

<sup>c</sup> *Department of chemistry, College of Science, King Khalid University, P.O. Box 9004, Abha 61413, Saudi Arabia*

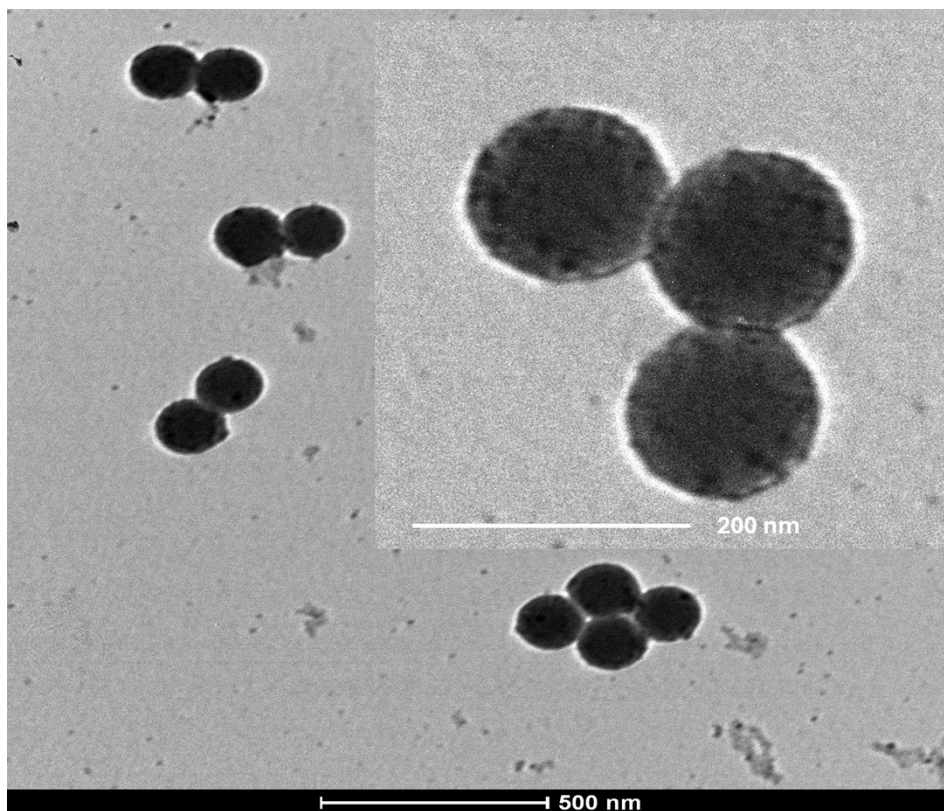

Fig. S1. TEM images of Ag-p(sty)@p(NIPMAM-DMAEMA) hybrid microgels.

---

\* Corresponding Authors: [robina.hons@pu.edu.pk](mailto:robina.hons@pu.edu.pk), [robina.chem@pu.edu.pk](mailto:robina.chem@pu.edu.pk) (R. Begum), [zahoor.chem@pu.edu.pk](mailto:zahoor.chem@pu.edu.pk), [zhfarooqi@gmail.com](mailto:zhfarooqi@gmail.com) (Z. H. Farooqi)

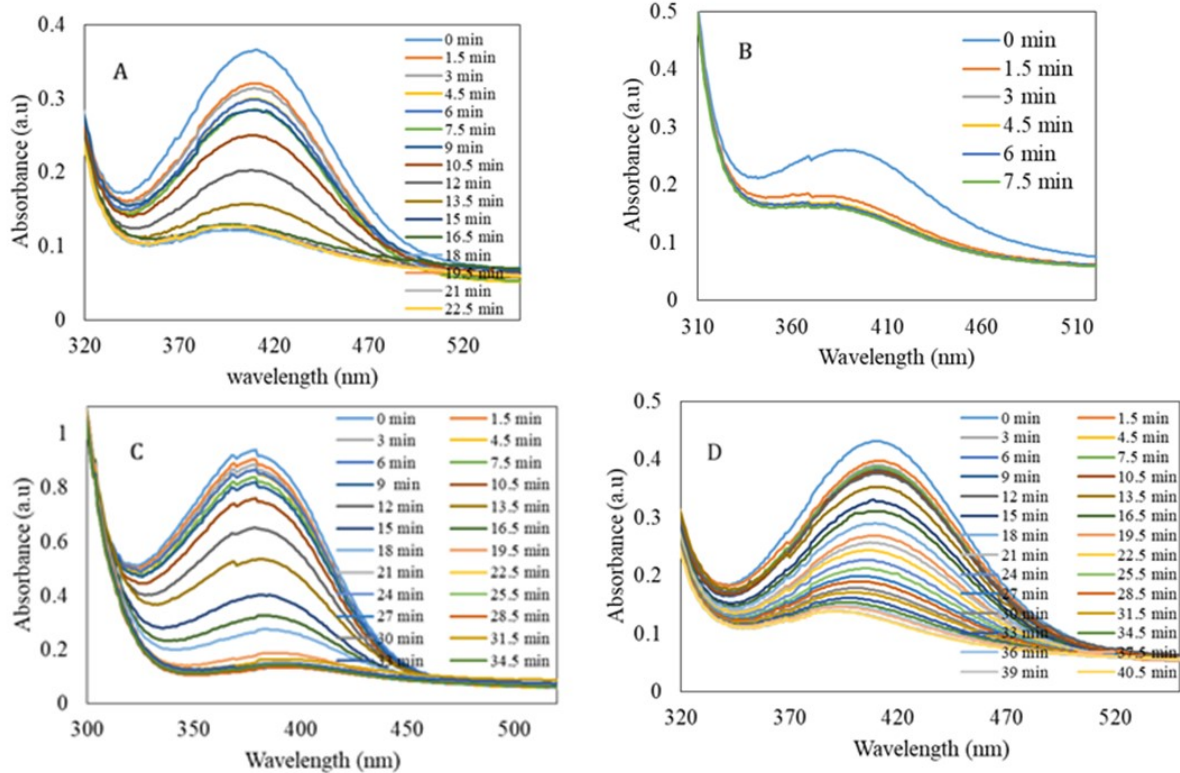

**Fig. S2:** The catalytic reduction of 0.06 mM A) 2-nitroaniline, B) 3-nitroaniline, C) 4-nitroaniline, and D) 2-nitrophenol by 15 mM NaBH<sub>4</sub> in the presence of 0.1616 mg/mL Ag-p(sty)@p(NIPMAM-DMAEMA) at 30°C in aqueous medium.

**Table S1:** Reduction reaction of nitroarenes, substrates, products, concentration of substrates, NaBH<sub>4</sub>, catalyst and reaction completion time.

| Entry | Reactant | product | Substrate concentration (mM) | NaBH <sub>4</sub> (mM) | Catalyst (mg/mL) | Reaction time (min) |
|-------|----------|---------|------------------------------|------------------------|------------------|---------------------|
| 1     |          |         | 0.06                         | 15                     | 0.1616           | 22.50               |
| 2     |          |         | 0.06                         | 15                     | 0.1616           | 7.50                |
| 3     |          |         | 0.06                         | 15                     | 0.1616           | 34.50               |
| 4     |          |         | 0.06                         | 15                     | 0.1616           | 40.50               |
